# Supplementary material
Source: PubMed Central journal article supplement (PMC4337534)
Supplement: JVI.03625-14_zjv999090167so1.pdf [file JVI.03625-14_zjv999090167so1.pdf]

Supplemental Table 1: BKPyV NCCR sequences

| Name                  | Sequence 5'->3'                                                                                                                                                                                                                                                                                                                                                                                                                 |
|-----------------------|---------------------------------------------------------------------------------------------------------------------------------------------------------------------------------------------------------------------------------------------------------------------------------------------------------------------------------------------------------------------------------------------------------------------------------|
| <i>ww(1.4)</i>        | TTTTGCAAAAATTGCAAAGAATAGGGATTTCCCCCAAATAGTTTTGCTAGGCCTCAGAAAAAGCCTCCACACCCTTACTACTTGAGAGAAAGGGT<br>GGAGGCAGAGGCGGCCTCGGCCTCTTATATATTATAAAAAAAAAAGGCCACAGGGAGGAGCTGCTTACCCATGGAATGCAGCCAAACCATGACCTCA<br>GGAAGGAAAGTGCATGACTGGGCAGCCAGCCAGTGGCAGTTAATAGTGAAACCCCGCCCCTGAAATTCTCAAATAAACACAAGAGGAAGTGGAAAC<br>TGGCCAAAGGAGTGGAAAGCAGCCAGACAGACATGTTTTGCGGGCCTAGGAATCTTGGCCTTGTCGCCAGTTAAACTGGACAAAGGCC                            |
| <i>sp1-1</i>          | TTTTGCAAAAATTGCAAAGAATAGGGATTTCCCCCAAATAGTTTTGCTAGGCCTCAGAAAAAGCCTCCACACCCTTACTACTTGAGAGAAAGGGT<br>GG <b>AAACA</b> T <b>ATCCAT</b> CCT <b>AGGCA</b> TCTTATATATTATAAAAAAAAAAGGCCACAGGGAGGAGCTGCTTACCCATGGAATGCAGCCAAACCATGACCTC<br>AGGAAGGAAAGTGCATGACTGGGCAGCCAGCCAGTGGCAGTTAATAGTGAAACCCCGCCCCTGAAATTCTCAAATAAACACAAGAGGAAGTGGAAA<br>CTGGCCAAAGGAGTGGAAAGCAGCCAGACAGACATGTTTTGCGGGCCTAGGAATCTTGGCCTTGTCGCCAGTTAAACTGGACAAAGGCC |
| <i>sp1-2</i>          | TTTTGCAAAAATTGCAAAGAATAGGGATTTCCCCCAAATAGTTTTGCTAGGCCTCAGAAAAAGCCTCCACACCCTTACTACTTGAGAGAAAGGGT<br>GGAGGCAGAGGCGGCCTCGGCCTCTTATATATTATAAAAAAAAAAGGCCACAG <b>TTAT</b> GAGCTGCTTACCCATGGAATGCAGCCAAACCATGACCTC<br>AGGAAGGAAAGTGCATGACTGGGCAGCCAGCCAGTGGCAGTTAATAGTGAAACCCCGCCCCTGAAATTCTCAAATAAACACAAGAGGAAGTGGAAA<br>CTGGCCAAAGGAGTGGAAAGCAGCCAGACAGACATGTTTTGCGGGCCTAGGAATCTTGGCCTTGTCGCCAGTTAAACTGGACAAAGGCC                   |
| <i>sp1-4a</i>         | TTTTGCAAAAATTGCAAAGAATAGGGATTTCCCCCAAATAGTTTTGCTAGGCCTCAGAAAAAGCCTCCACACCCTTACTACTTGAGAGAAAGGGT<br>GGAGGCAGAGGCGGCCTCGGCCTCTTATATATTATAAAAAAAAAAGGCCACAGGGAGGAGCTGCTTACCCATGGAATGCAGCCAAACCATGACCTCA<br>GGAAGGAAAGTGCATGACTGGGCAGCCAGCCAGTGGCAGTTAATAGTGAAACCC <b>GATA</b> CCCTGAAATTCTCAAATAAACACAAGAGGAAGTGGAAA<br>CTGGCCAAAGGAGTGGAAAGCAGCCAGACAGACATGTTTTGCGGGCCTAGGAATCTTGGCCTTGTCGCCAGTTAAACTGGACAAAGGCC                  |
| <i>sp1-4b</i>         | TTTTGCAAAAATTGCAAAGAATAGGGATTTCCCCCAAATAGTTTTGCTAGGCCTCAGAAAAAGCCTCCACACCCTTACTACTTGAGAGAAAGGGT<br>GGAGGCAGAGGCGGCCTCGGCCTCTTATATATTATAAAAAAAAAAGGCCACAGGGAGGAGCTGCTTACCCATGGAATGCAGCCAAACCATGACCTCA<br>GGAAGGAAAGTGCATGACTGGGCAGCCAGCCAGTGGCAGTTAATA <b>ATGACACTT</b> CGCCCCTGAAATTCTCAAATAAACACAAGAGGAAGTGGAAA<br>CTGGCCAAAGGAGTGGAAAGCAGCCAGACAGACATGTTTTGCGGGCCTAGGAATCTTGGCCTTGTCGCCAGTTAAACTGGACAAAGGCC                   |
| <i>sp1-4 5CG</i>      | TTTTGCAAAAATTGCAAAGAATAGGGATTTCCCCCAAATAGTTTTGCTAGGCCTCAGAAAAAGCCTCCACACCCTTACTACTTGAGAGAAAGGGT<br>GGAGGCAGAGGCGGCCTCGGCCTCTTATATATTATAAAAAAAAAAGGCCACAGGGAGGAGCTGCTTACCCATGGAATGCAGCCAAACCATGACCTCA<br>GGAAGGAAAGTGCATGACTGGGCAGCCAGCCAGTGGCAGTTAATAGTGAAACCC <b>GG</b> CCCCTGAAATTCTCAAATAAACACAAGAGGAAGTGGAAA<br>CTGGCCAAAGGAGTGGAAAGCAGCCAGACAGACATGTTTTGCGGGCCTAGGAATCTTGGCCTTGTCGCCAGTTAAACTGGACAAAGGCC                   |
| <i>sp1-4 5CG/10CT</i> | TTTTGCAAAAATTGCAAAGAATAGGGATTTCCCCCAAATAGTTTTGCTAGGCCTCAGAAAAAGCCTCCACACCCTTACTACTTGAGAGAAAGGGT<br>GGAGGCAGAGGCGGCCTCGGCCTCTTATATATTATAAAAAAAAAAGGCCACAGGGAGGAGCTGCTTACCCATGGAATGCAGCCAAACCATGACCTCA<br>GGAAGGAAAGTGCATGACTGGGCAGCCAGCCAGTGGCAGTTAATAGTGAAACCC <b>GG</b> CCC <b>T</b> TGAAATTCTCAAATAAACACAAGAGGAAGTGGAAA<br>CTGGCCAAAGGAGTGGAAAGCAGCCAGACAGACATGTTTTGCGGGCCTAGGAATCTTGGCCTTGTCGCCAGTTAAACTGGACAAAGGCC          |
| <i>sp1-4 10CT</i>     | TTTTGCAAAAATTGCAAAGAATAGGGATTTCCCCCAAATAGTTTTGCTAGGCCTCAGAAAAAGCCTCCACACCCTTACTACTTGAGAGAAAGGGT                                                                                                                                                                                                                                                                                                                                 |

|                                 |                                                                                                                                                                                                                                                                                                                                                                                                                                                                    |
|---------------------------------|--------------------------------------------------------------------------------------------------------------------------------------------------------------------------------------------------------------------------------------------------------------------------------------------------------------------------------------------------------------------------------------------------------------------------------------------------------------------|
|                                 | GGAGGCAGAGGCGGCCTCGGCCTCTTATATATTATAAAAAAAAAAGGCCACAGGGAGGAGCTGCTTACCCATGGAATGCAGCCAAACCATGACCTCA<br>GGAAGGAAAGTGCATGACTGGGCAGCCAGCCAGTGGCAGTTAATAGTGAAACCCCGCCC <b>T</b> TGAAATTCTCAAATAAACACAAGAGGAAGTGGAAA<br>CTGGCCAAAGGAGTGGAAAGCAGCCAGACAGACATGTTTTGCGGGCCTAGGAATCTTGGCCTTGTCGCCAGTTAACTGGACAAAGGCC                                                                                                                                                          |
| <i>sp1-4</i><br><i>7CG/10CT</i> | TTTTGCAAAAATTGCAAAGAATAGGGATTTCCCCAAATAGTTTTGCTAGGCCTCAGAAAAAGCCTCCACACCCTTACTACTTGAGAGAAAGGGT<br>GGAGGCAGAGGCGGCCTCGGCCTCTTATATATTATAAAAAAAAAAGGCCACAGGGAGGAGCTGCTTACCCATGGAATGCAGCCAAACCATGACCTCA<br>GGAAGGAAAGTGCATGACTGGGCAGCCAGCCAGTGGCAGTTAATAGTGAAACCCCG <b>G</b> C <b>T</b> TGAAATTCTCAAATAAACACAAGAGGAAGTGGAAA<br>CTGGCCAAAGGAGTGGAAAGCAGCCAGACAGACATGTTTTGCGGGCCTAGGAATCTTGGCCTTGTCGCCAGTTAACTGGACAAAGGCC                                                |
| <i>sp1-1*</i><br><i>sp1-4a</i>  | TTTTGCAAAAATTGCAAAGAATAGGGATTTCCCCAAATAGTTTTGCTAGGCCTCAGAAAAAGCCTCCACACCCTTACTACTTGAGAGAAAGGGT<br>GGA <b>AA</b> CA <b>TATC</b> CA <b>T</b> CT <b>AGGC</b> A <b>T</b> CTTATATATTATAAAAAAAAAAGGCCACAGGGAGGAGCTGCTTACCCATGGAATGCAGCCAAACCATGACCTC<br>AGGAAGGAAAGTGCATGACTGGGCAGCCAGCCAGTGGCAGTTAATAGTGAAAC <b>CGATA</b> CCCTGAAATTCTCAAATAAACACAAGAGGAAGTGGAA<br>ACTGGCCAAAGGAGTGGAAAGCAGCCAGACAGACATGTTTTGCGGGCCTAGGAATCTTGGCCTTGTCGCCAGTTAACTGGACAAAGGCC            |
| <i>sp1-2*</i><br><i>sp1-4a</i>  | TTTTGCAAAAATTGCAAAGAATAGGGATTTCCCCAAATAGTTTTGCTAGGCCTCAGAAAAAGCCTCCACACCCTTACTACTTGAGAGAAAGGGT<br>GGAGGCAGAGGCGGCCTCGGCCTCTTATATATTATAAAAAAAAAAGGCCACAG <b>TTAT</b> TGAGCTGCTTACCCATGGAATGCAGCCAAACCATGACCTC<br>AGGAAGGAAAGTGCATGACTGGGCAGCCAGCCAGTGGCAGTTAATAGTGAAAC <b>CTATT</b> CCCTGAAATTCTCAAATAAACACAAGAGGAAGTGGAA<br>ACTGGCCAAAGGAGTGGAAAGCAGCCAGACAGACATGTTTTGCGGGCCTAGGAATCTTGGCCTTGTCGCCAGTTAACTGGACAAAGGCC                                              |
| <i>sp1-2*</i><br><i>ets1-2</i>  | TTTTGCAAAAATTGCAAAGAATAGGGATTTCCCCAAATAGTTTTGCTAGGCCTCAGAAAAAGCCTCCACACCCTTACTACTTGAGAGAAAGGGT<br>GGAGGCAGAGGCGGCCTCGGCCTCTTATATATTATAAAAAAAAAAGGCCACAG <b>TTAT</b> TGAGCTGCTTACCCATGGAATGCAGCCAAACCATGACCTC<br>AGGAAGGAAAGTGCATGACTGGGCAGCCAGCCAGTGGCAGTTAATAGTGAAACCCCGCCCCTGAAATTCTCAAATAAACACA <b>TA</b> TTAAGTGGAA<br>ACTGGCCAAAGGAGTGGAAAGCAGCCAGACAGACATGTTTTGCGGGCCTAGGAATCTTGGCCTTGTCGCCAGTTAACTGGACAAAGGCC                                               |
| <i>sp1-4*</i><br><i>ets1-2</i>  | TTTTGCAAAAATTGCAAAGAATAGGGATTTCCCCAAATAGTTTTGCTAGGCCTCAGAAAAAGCCTCCACACCCTTACTACTTGAGAGAAAGGGT<br>GGAGGCAGAGGCGGCCTCGGCCTCTTATATATTATAAAAAAAAAAGGCCACAGGGAGGAGCTGCTTACCCATGGAATGCAGCCAAACCATGACCTCA<br>GGAAGGAAAGTGCATGACTGGGCAGCCAGCCAGTGGCAGTTAATAGTGAAAC <b>CGATA</b> CCCTGAAATTCTCAAATAAACACA <b>TA</b> TTAAGTGGAAA<br>CTGGCCAAAGGAGTGGAAAGCAGCCAGACAGACATGTTTTGCGGGCCTAGGAATCTTGGCCTTGTCGCCAGTTAACTGGACAAAGGCC                                                |
| <i>sp1-(1,2,4a)</i>             | TTTTGCAAAAATTGCAAAGAATAGGGATTTCCCCAAATAGTTTTGCTAGGCCTCAGAAAAAGCCTCCACACCCTTACTACTTGAGAGAAAGGGT<br>GGA <b>AA</b> CA <b>TATC</b> CA <b>T</b> CT <b>AGGC</b> A <b>T</b> CTTATATATTATAAAAAAAAAAGGCCACAG <b>TTAT</b> TGAGCTGCTTACCCATGGAATGCAGCCAAACCATGACCT<br>CAGGAAGGAAAGTGCATGACTGGGCAGCCAGCCAGTGGCAGTTAATAGTGAAAC <b>CGATA</b> CCCTGAAATTCTCAAATAAACACAAGAGGAAGTGGAA<br>AACTGGCCAAAGGAGTGGAAAGCAGCCAGACAGACATGTTTTGCGGGCCTAGGAATCTTGGCCTTGTCGCCAGTTAACTGGACAAAGGCC |
| <i>yy1*sp1-2</i>                | TTTTGCAAAAATTGCAAAGAATAGGGATTTCCCCAAATAGTTTTGCTAGGCCTCAGAAAAAGCCTCCACACCCTTACTACTTGAGAGAAAGGGT<br>GGAGGCAGAGGCGGCCTCGGCCTCTTATATATTATAAAAAAAAAAGGCCACAG <b>TTAT</b> TGAGCTGCTTACT <b>TGC</b> TGGAATGCAGCCAAACCATGACCTC<br>AGGAAGGAAAGTGCATGACTGGGCAGCCAGCCAGTGGCAGTTAATAGTGAAACCCCGCCCCTGAAATTCTCAAATAAACACAAGAGGAAGTGGAAA<br>CTGGCCAAAGGAGTGGAAAGCAGCCAGACAGACATGTTTTGCGGGCCTAGGAATCTTGGCCTTGTCGCCAGTTAACTGGACAAAGGCC                                             |
| <i>nf1-1</i>                    | TTTTGCAAAAATTGCAAAGAATAGGGATTTCCCCAAATAGTTTTGCTAGGCCTCAGAAAAAGCCTCCACACCCTTACTACTTGAGAGAAAGGGT<br>GGAGGCAGAGGCGGCCTCGGCCTCTTATATATTATAAAAAAAAAAGGCCACAGGGAGGAGCTGCTTACCCAT <b>AGA</b> ATGCAG <b>TCTA</b> ACCATGACCTC                                                                                                                                                                                                                                               |

|                        |                                                                                                                                                                                                                                                                                                                                                                                                                                                              |
|------------------------|--------------------------------------------------------------------------------------------------------------------------------------------------------------------------------------------------------------------------------------------------------------------------------------------------------------------------------------------------------------------------------------------------------------------------------------------------------------|
|                        | AGGAAGGAAAGTGCATGACTGGGCAGCCAGCCAGTGGCAGTTAATAGTGAAACCCCGCCCCTGAAATTCTCAAATAAACACAAGAGGAAGTGGAAA<br>CTGGCCAAAGGAGTGGAAAGCAGCCAGACAGACATGTTTTGCGGGCCTAGGAATCTTGGCCTTGTCCCCAGTTAAACTGGACAAAGGCC                                                                                                                                                                                                                                                                |
| <i>nf1-2</i>           | TTTTGCAAAAATTGCAAAAGAATAGGGATTTCCCCCAAATAGTTTTGCTAGGCCTCAGAAAAAGCCTCCACACCCTTACTACTTGAGAGAAAGGGT<br>GGAGGCAGAGGCGGCCTCGGCCTCTTATATATTATAAAAAAAAAAGGCCACAGGGAGGAGCTGCTTACCCATGGAATGCAGCCAAACCATGACCTCA<br>GGAAGGAAAGTGCATGAA <b>ACATGCAATAC</b> GCCAGTGGCAGTTAATAGTGAAACCCCGCCCCTGAAATTCTCAAATAAACACAAGAGGAAGTGGAAA<br>CTGGCCAAAGGAGTGGAAAGCAGCCAGACAGACATGTTTTGCGGGCCTAGGAATCTTGGCCTTGTCCCCAGTTAAACTGGACAAAGGCC                                              |
| <i>nf1-3</i>           | TTTTGCAAAAATTGCAAAAGAATAGGGATTTCCCCCAAATAGTTTTGCTAGGCCTCAGAAAAAGCCTCCACACCCTTACTACTTGAGAGAAAGGGT<br>GGAGGCAGAGGCGGCCTCGGCCTCTTATATATTATAAAAAAAAAAGGCCACAGGGAGGAGCTGCTTACCCATGGAATGCAGCCAAACCATGACCTCA<br>GGAAGGAAAGTGCATGACTGGGCAGCCAGCCAGTGGCAGTTAATAGTGAAACCCCGCCCCTGAAATTCTCAAATAAACACAAGAGGAAGT <b>AGAAA</b><br>CTGG <b>TCT</b> AAGGAGTGGAAAGCAGCCAGACAGACATGTTTTGCGGGCCTAGGAATCTTGGCCTTGTCCCCAGTTAAACTGGACAAAGGCC                                       |
| <i>nf1-4</i>           | TTTTGCAAAAATTGCAAAAGAATAGGGATTTCCCCCAAATAGTTTTGCTAGGCCTCAGAAAAAGCCTCCACACCCTTACTACTTGAGAGAAAGGGT<br>GGAGGCAGAGGCGGCCTCGGCCTCTTATATATTATAAAAAAAAAAGGCCACAGGGAGGAGCTGCTTACCCATGGAATGCAGCCAAACCATGACCTCA<br>GGAAGGAAAGTGCATGACTGGGCAGCCAGCCAGTGGCAGTTAATAGTGAAACCCCGCCCCTGAAATTCTCAAATAAACACAAGAGGAAGTGGAAAC<br>TGGCCAAAGGAGT <b>TTACATC</b> AGCCAGACAGACATGTTTTGCGGGCCTAGGAATCTTGGCCTTGTCCCCAGTTAAACTGGACAAAGGCC                                               |
| <i>nf1-5</i>           | TTTTGCAAAAATTGCAAAAGAATAGGGATTTCCCCCAAATAGTTTTGCTAGGCCTCAGAAAAAGCCTCCACACCCTTACTACTTGAGAGAAAGGGT<br>GGAGGCAGAGGCGGCCTCGGCCTCTTATATATTATAAAAAAAAAAGGCCACAGGGAGGAGCTGCTTACCCATGGAATGCAGCCAAACCATGACCTCA<br>GGAAGGAAAGTGCATGACTGGGCAGCCAGCCAGTGGCAGTTAATAGTGAAACCCCGCCCCTGAAATTCTCAAATAAACACAAGAGGAAGTGGAAAC<br>TGGCCAAAGGAGTGGAAAGCAGCCAGACAGACATGTTTTGCGGGCCTAGGAATCTT <b>AGCA</b> ATTGTCT <b>TCC</b> AGTTAAACTGGACAAAGGCC                                    |
| <i>nf1-(1,3,5)</i>     | TTTTGCAAAAATTGCAAAAGAATAGGGATTTCCCCCAAATAGTTTTGCTAGGCCTCAGAAAAAGCCTCCACACCCTTACTACTTGAGAGAAAGGGT<br>GGAGGCAGAGGCGGCCTCGGCCTCTTATATATTATAAAAAAAAAAGGCCACAGGGAGGAGCTGCTTACCCAT <b>AGA</b> ATGCAG <b>TCTA</b> ACCATGACCTC<br>AGGAAGGAAAGTGCATGACTGGGCAGCCAGCCAGTGGCAGTTAATAGTGAAACCCCGCCCCTGAAATTCTCAAATAAACACAAGAGGAAGT <b>AGAA</b><br>ACTGG <b>TCTA</b> AGGAGTGGAAAGCAGCCAGACAGACATGTTTTGCGGGCCTAGGAATCTT <b>AGCA</b> ATTGTCT <b>TCC</b> AGTTAAACTGGACAAAGGCC |
| <i>yy1*nf1-1</i>       | TTTTGCAAAAATTGCAAAAGAATAGGGATTTCCCCCAAATAGTTTTGCTAGGCCTCAGAAAAAGCCTCCACACCCTTACTACTTGAGAGAAAGGGT<br>GGAGGCAGAGGCGGCCTCGGCCTCTTATATATTATAAAAAAAAAAGGCCACAGGGAGGAGCTGCTTACT <b>TGCT</b> AGAATGCAG <b>TCTA</b> ACCATGACCT<br>CAGGAAGGAAAGTGCATGACTGGGCAGCCAGCCAGTGGCAGTTAATAGTGAAACCCCGCCCCTGAAATTCTCAAATAAACACAAGAGGAAGTGGAA<br>ACTGGCCAAAGGAGTGGAAAGCAGCCAGACAGACATGTTTTGCGGGCCTAGGAATCTTGGCCTTGTCCCCAGTTAAACTGGACAAAGGCC                                     |
| <i>ets1-2</i>          | TTTTGCAAAAATTGCAAAAGAATAGGGATTTCCCCCAAATAGTTTTGCTAGGCCTCAGAAAAAGCCTCCACACCCTTACTACTTGAGAGAAAGGGT<br>GGAGGCAGAGGCGGCCTCGGCCTCTTATATATTATAAAAAAAAAAGGCCACAGGGAGGAGCTGCTTACCCATGGAATGCAGCCAAACCATGACCTCA<br>GGAAGGAAAGTGCATGACTGGGCAGCCAGCCAGTGGCAGTTAATAGTGAAACCCCGCCCCTGAAATTCTCAAATAAACACA <b>TATTA</b> AGTGGAAA<br>CTGGCCAAAGGAGTGGAAAGCAGCCAGACAGACATGTTTTGCGGGCCTAGGAATCTTGGCCTTGTCCCCAGTTAAACTGGACAAAGGCC                                                |
| <i>ets1-2</i><br>15.10 | TTTTGCAAAAATTGCAAAAGAATAGGGATTTCCCCCAAATAGTTTTGCTAGGCCTCAGAAAAAGCCTCCACACCCTTACTACTTGAGAGAAAGGGT<br>GGAGGCAGAGGCGGCCTCGGCCTCTTATATATTATAAAAAAAAAAGGCCACAGGGAGGAGCTGCTTACCCATGGAATGCAGCCAAACCATGACCTCA<br>GGAAGGAAAGTGCATGACTGGGCAGCCAGCCAGTGGCAGTTAATAGTGAAACCCCGCCCCTGAAATTCTCAAATAAACACA <b>C</b> AGGAAGTGGAAAC                                                                                                                                            |

|                                                 |                                                                                                                                                                                                                                                                                                                                                                                                                                                  |
|-------------------------------------------------|--------------------------------------------------------------------------------------------------------------------------------------------------------------------------------------------------------------------------------------------------------------------------------------------------------------------------------------------------------------------------------------------------------------------------------------------------|
|                                                 | TGGCCAAAGGAGTGGAAAGCAGCCAGACAGACATGTTTTGCGGGCCTAGGAATCTTGGCCTTGTC CCCAGTTAAACTGGACAAAGGCC                                                                                                                                                                                                                                                                                                                                                        |
| <i>ets1-2</i><br><i>HI-u6/CAP-</i><br><i>m5</i> | TTTTGCAAAAATTGCAAAAGAATAGGGATTTCCCCCAAATAGTTTTGCTAGGCCTCAGAAAAAGCCTCCACACCCTTACTACTTGAGAGAAAGGGT<br>GGAGGCAGAGGCGGCCTCGGCCTCTTATATATTATAAAAAAAAAAGGCCACAGGGAGGAGCTGCTTACCCATGGAATGCAGCCAAACCATGACCTCA<br>GGAAGGAAAGTGCATGACTGGGCAGCCAGCCAGTGGCAGTTAATAGTGAAACCCCGCCCCTGAAATTCTCAAATAAACACAAGAGGGAGTGGAAAC<br>TGGCCAAAGGAGTGGAAAGCAGCCAGACAGACATGTTTTGCGGGCCTAGGAATCTTGGCCTTGTC CCCAGTTAAACTGGACAAAGGCC                                           |
| <i>p53</i>                                      | TTTTGCAAAAATTGCAAAAGAATAGGGATTTCCCCCAAATAGTTTTGCTAGGCCTCAGAAAAAGCCTCCACACCCTTACTACTTGAGAGAAAGGGT<br>GGAGGCAGAGGCGGCCTCGGCCTCTTATATATTATAAAAAAAAAAGGCCACAGGGAGGAGCTGCTTACCCATGGAATGCAGCCAAACCATGACCTCA<br>GGAAGGAAAGTGCATGACTGGGCAGCCAGCCAGTGGCAGTTAATAGTGAAACCCCGCCCCTGAAATTCTCAAATAAACACAAGAGGAAGTGGAAAC<br>TGGCCAAA GGAGTGGAAAGCAGCCAGACATAACTTTCTTTCGCGGGCCTAGGAATCTTGGCCTT GTCCCCAGTTAAACTGGACAAAGGCC                                        |
| <i>yy1</i>                                      | TTTTGCAAAAATTGCAAAAGAATAGGGATTTCCCCCAAATAGTTTTGCTAGGCCTCAGAAAAAGCCTCCACACCCTTACTACTTGAGAGAAAGGGT<br>GGAGGCAGAGGCGGCCTCGGCCTCTTATATATTATAAAAAAAAAAGGCCACAGGGAGGAGCTGCTTACT <b>TGCT</b> GGAATGCAGCCAAACCATGACCTC<br>AGGAAGGAAAGTGCATGACTGGGCAGCCAGCCAGTGGCAGTTAATAGTGAAACCCCGCCCCTGAAATTCTCAAATAAACACAAGAGGAAGTGGAAA<br>CTGGCCAAAGGAGTGGAAAGCAGCCAGACAGACATGTTTTGCGGGCCTAGGAATCTTGGCCTTGTC CCCAGTTAAACTGGACAAAGGCC                                 |
| <i>Itag1-2</i>                                  | TTTTGCAAAAATTGCAAAAGAATAGGGATTTCCCCCAAATAGTTTTGCTAG <b>TGCC</b> CAGAAAA <b>TGCC</b> CCACACCCTTACTACTTGAGAGAAAGGG<br>TGGAGGCAGAGGCGGCCTCGGCCTCTTATATATTATAAAAAAAAAAGGCCACAGGGAGGAGCTGCTTACCCATGGAATGCAGCCAAACCATGACCTC<br>AGGAAGGAAAGTGCATGACTGGGCAGCCAGCCAGTGGCAGTTAATAGTGAAACCCCGCCCCTGAAATTCTCAAATAAACACAAGAGGAAGTGGAAA<br>CTGGCCAAAGGAGTGGAAAGCAGCCAGACAGACATGTTTTGCGGGCCTAGGAATCTTGGCCTTGTC CCCAGTTAAACTGGACAAAGGCC                          |
| <i>Itag3-4</i>                                  | TTTTGCAAAAATTGCAAAAGAATAGGGATTTCCCCCAAATAGTTTTGCTAGGCCTCAGAAAAAGCCTCCACACCCTTACTACTTGAGAGAAAGGGT<br>GGAGGCAGAGGCGG <b>TAG</b> CGG <b>TAG</b> CTTATATATTATAAAAAAAAAAGGCCACAGGGAGGAGCTGCTTACCCATGGAATGCAGCCAAACCATGACCTC<br>AGGAAGGAAAGTGCATGACTGGGCAGCCAGCCAGTGGCAGTTAATAGTGAAACCCCGCCCCTGAAATTCTCAAATAAACACAAGAGGAAGTGGAAA<br>CTGGCCAAAGGAGTGGAAAGCAGCCAGACAGACATGTTTTGCGGGCCTAGGAATCTTGGCCTTGTC CCCAGTTAAACTGGACAAAGGCC                         |
| <i>R8-18</i>                                    | TTTTGCAAAAATTGCAAAAGAATAGGGATTTCCCCCAAATAGTTTTGCTAGGCCTCAGAAAAAGCCTCCACACCCTTACTACTTGAGAGAAAGGGT<br>GGAGGCAGAGGCGGCCTCGGCCTCTTATATATTATAAAAAAAAAAGGCCACAGGGAGGAGCTGCTTACCCATGGAATGCAGCCAAACCATGACCTCA<br>GGAAGGAAAGTGCATGACTGGGCAGCCAGCCAGTGGCAGTTAATAGTGAAACCCCGCCCCTGAAAACACAAGAGGAAGTGGAAACTGGCCAAAGGA<br>GTGGAAAGCAGCCAGACAGACATGTTTTGCGGGCCTAGGAATCTTGGCCTTGTC CCCAGTTAAACTGGACAAAGGCC                                                      |
| <i>R8-18*</i><br><i>sp1-(1,2,4a)</i>            | TTTTGCAAAAATTGCAAAAGAATAGGGATTTCCCCCAAATAGTTTTGCTAGGCCTCAGAAAAAGCCTCCACACCCTTACTACTTGAGAGAAAGGGT<br>GGAA <b>ACA</b> T <b>ATCCAT</b> CT <b>AGGCAT</b> CTTATATATTATAAAAAAAAAAGGCCACAG <b>TTAT</b> TAGCTGCTTACCCATGGAATGCAGCCAAACCATGACCT<br>CAGGAAGGAAAGTGCATGACTGGGCAGCCAGCCAGTGGCAGTTAATAGTGAAAC <b>CGATA</b> CCCTGAAAACACAAGAGGAAGTGGAAACTGGCCAAA<br>GGAGTGGAAAGCAGCCAGACAGACATGTTTTGCGGGCCTAGGAATCTTGGCCTTGTC CCCAGTTAAACTGGACAAAGGCC          |
| <i>R8-18*</i><br><i>nf1-(1,3,5)</i>             | TTTTGCAAAAATTGCAAAAGAATAGGGATTTCCCCCAAATAGTTTTGCTAGGCCTCAGAAAAAGCCTCCACACCCTTACTACTTGAGAGAAAGGGT<br>GGAGGCAGAGGCGGCCTCGGCCTCTTATATATTATAAAAAAAAAAGGCCACAGGGAGGAGCTGCTTACCCAT <b>AGA</b> ATGCAG <b>TCTA</b> ACCATGACCTC<br>AGGAAGGAAAGTGCATGACTGGGCAGCCAGCCAGTGGCAGTTAATAGTGAAACCCCGCCCCTGAAAACACAAGAGGAAGT <b>AGAA</b> ACTGG <b>TCTA</b> AG<br>GAGTGGAAAGCAGCCAGACAGACATGTTTTGCGGGCCTAGGAATCT <b>AGCA</b> TTGT <b>CTC</b> CCAGTTAAACTGGACAAAGGCC |

|                                |                                                                                                                                                                                                                                                                                                                                                                                                          |
|--------------------------------|----------------------------------------------------------------------------------------------------------------------------------------------------------------------------------------------------------------------------------------------------------------------------------------------------------------------------------------------------------------------------------------------------------|
| <i>R8-18</i><br><i>ltag1-2</i> | TTTGC AAAAATTGCAAAGAATAGGGATTTCCCCAAATAGTTTGGCTAG <b>TGCC</b> CAGAAAA <b>TGCC</b> CCACACCCTTACTACTTGAGAGAAAGGG<br>TGGAGGCAGAGGCGGCCTCGGCCTCTTATATATTATAAAAAAAGGCCACAGGGAGGAGCTGCTTACCCATGGAATGCAGCCAAACCATGACCTC<br>AGGAAGGAAAGTGCATGACTGGGCAGCCAGCCAGTGGCAGTTAATAGTGAAACCCCGCCCCTGAAAACACAAGAGGAAGTGGAAACTGGCCAAAGG<br>AGTGGAAAGCAGCCAGACAGACATGTTTTGCGGGCCTAGGAATCTTGGCCTTGTC CCCAGTTAAACTGGACAAAGGCC  |
| <i>R8-18</i><br><i>ltag3-4</i> | TTTGC AAAAATTGCAAAGAATAGGGATTTCCCCAAATAGTTTGGCTAGGCCTCAGAAAAAGCCTCCACACCCTTACTACTTGAGAGAAAGGGT<br>GGAGGCAGAGGCGG <b>TAG</b> CGG <b>TAG</b> CTTATATATTATAAAAAAAGGCCACAGGGAGGAGCTGCTTACCCATGGAATGCAGCCAAACCATGACCTC<br>AGGAAGGAAAGTGCATGACTGGGCAGCCAGCCAGTGGCAGTTAATAGTGAAACCCCGCCCCTGAAAACACAAGAGGAAGTGGAAACTGGCCAAAGG<br>AGTGGAAAGCAGCCAGACAGACATGTTTTGCGGGCCTAGGAATCTTGGCCTTGTC CCCAGTTAAACTGGACAAAGGCC |
